# Supplementary material for: Global research trends of lactylation in cancer: a bibliometric analysis
Source: Research Square preprint supplement (doi:10.21203/rs.3.rs-7345006/v1), 2025-10-14

**Table S1. Distribution of Tumor Types in Lactylation Studies**

| **Cancer type** | **publication** | **Proportion** |
| --- | --- | --- |
| Other* | 77 | EXCLUDING |
| Bladder cancer | 5 | 3% |
| breast cancer | 10 | 7% |
| Cervical cancer | 4 | 3% |
| Colorectal cancer | 15 | 10% |
| Endometrial carcinoma | 1 | 1% |
| Esophageal cancer | 5 | 3% |
| Gastric cancer | 14 | 10% |
| Glioma | 11 | 7% |
| Head and neck squamous cell carcinoma | 1 | 1% |
| Leukemia | 4 | 3% |
| Liver cancer | 27 | 18% |
| Lung cancer | 12 | 8% |
| Lymphoma | 1 | 1% |
| Melanoma | 1 | 1% |
| Multiple myeloma | 1 | 1% |
| Nasopharyngeal carcinoma | 1 | 1% |
| Neuroblastoma | 1 | 1% |
| Oral squamous cell carcinoma | 3 | 2% |
| Ovarian cancer | 5 | 3% |
| Pancreatic cancer | 11 | 7% |
| Prostate cancer | 7 | 5% |
| Renal cell carcinoma | 6 | 4% |
| Thyroid cancer | 1 | 1% |
| **Total** | **224** |  |

* other contains some reviews without a certain tumor type or articles about Kaposi's sarcoma-associated herpesvirus (KSHV) and tumor-infiltrating myeloid cells.

**Table S2. Global Contributions to Lactylation Research**

| Country | Documents | Citations | Average | Exclusion of extreme values* | 2024 total If | If>10 |
| --- | --- | --- | --- | --- | --- | --- |
| China | 228 | 6753 | 30 | 22 | 1903.2 | 53 |
| USA | 13 | 1939 | 149 | 21 | 283.4 | 8 |
| United Kingdom | 3 | 74 | 25 | N/A | 66.4 | 2 |
| Germany | 2 | 12 | 6 | N/A | 42 | 2 |
| South Korea | 1 | 1661 | 1661 | 0 | 50.5 | 1 |
| Indonesia | 1 | 8 | 8 | N/A | 3 | 0 |
| Italy | 3 | 34 | 11 | N/A | 34.2 | 1 |
| Singapore | 1 | 44 | 44 | N/A | 9.1 | 0 |
| India | 2 | 42 | 21 | N/A | 6.7 | 0 |
| Japan | 2 | 1 | 1 | N/A | 8.5 | 0 |

* Exclude *Metabolic regulation of gene expression by histone lactylation, Nature, 2019*

**Table S3. Leading Institutions in Lactylation-Cancer Research**

| Organization | Documents | Citations | Average | Total IF | Average IF |
| --- | --- | --- | --- | --- | --- |
| Nanjing Med Univ | 20 | 370 | 19 | 197 | 9.85 |
| Fudan Univ | 14 | 397 | 28 | 138.5 | 9.89 |
| Shanghai Jiao Tong Univ | 14 | 638 | 46 | 143.5 | 10.25 |
| Chinese Acad Sci | 13 | 2063 | 159 | 257.1 | 18.36 |
| Cent South Univ | 13 | 219 | 17 | 88.7 | 6.82 |
| Sun Yet Sen Univ | 11 | 275 | 25 | 176.9 | 16.08 |
| Shandong First Med Univ | 8 | 157 | 20 | 75.4 | 9.43 |
| Chinese Aced Med Sci | 7 | 323 | 46 | 178.2 | 13.71 |
| Zhengzhou Univ | 7 | 199 | 28 | 121.9 | 17.41 |
| Tongji Univ | 5 | 147 | 29 | 95 | 19 |

**Table S4. Functional Characterization of Non-Histone Lactylation in Cancer**

| **Title** | **Journals** | **First author** | **Year** | **Citations** | **2024IF** | **JCR** | **Substrate** | **Lactylation Function** | **disease** |
| --- | --- | --- | --- | --- | --- | --- | --- | --- | --- |
| Lactylome analysis suggests lactylation-dependent mechanisms of metabolic adaptation in hepatocellular carcinoma | Nature Metabolism | Z. J. Yang | 2023 | 195 | 19.2 | Q1 | adenylate kinase 2 | inhibit adenylate kinase 2 function | hepatocellular carcinoma |
| Lactylation of METTL16 promotes cuproptosis via m6A-modification on FDX1 mRNA in gastric cancer | Nature Communications | L. H. Sun | 2023 | 88 | 14.7 | Q1 | METTL16 | promote METTL16 activity | gastric cancer |
| HIF1α lactylation enhances KIAA1199 transcription to promote angiogenesis and vasculogenic mimicry in prostate cancer | International Journal of Biological Macromolecules | Y. W. Luo | 2022 | 80 | 7.7 | Q1 | HIF1α | promote HIF1α stability | prostate cancer |
| Metabolic regulation of homologous recombination repair by MRE11 lactylation | Cell | Y. P. Chen | 2024 | 75 | 45.6 | Q1 | MRE11 | promote MRE11 DNA-binding ability |  |

**Table S4 (continued)**

| Alanyl-tRNA synthetase, AARS1, is a lactate sensor and lactyltransferase that lactylates p53 and contributes to tumorigenesis | Cell | Z. Zong | 2024 | 62 | 45.6 | Q1 | p53 | inhibit p53 activity |  |
| --- | --- | --- | --- | --- | --- | --- | --- | --- | --- |
| SIRT3-dependent delactylation of cyclin E2 prevents hepatocellular carcinoma growth | Embo Reports | J. Jin | 2023 | 59 | 6.5 | Q1 | cyclin E2 | inhibit cyclin E2 function | hepatocellular carcinoma |
| NBS1 lactylation is required for efficient DNA repair and chemotherapy resistance | Nature | H. X. Chen | 2024 | 46 | 50.5 | Q1 | NBS1 | promote MRN complex formation |  |
| NUSAP1-LDHA-Glycolysis-Lactate feedforward loop promotes Warburg effect and metastasis in pancreatic ductal adenocarcinoma | Cancer Letters | M. Chen | 2023 | 46 | 9.1 | Q1 | NUSAP1 | inhibit NUSAP1 protein degradation | pancreatic ductal adenocarcinoma |
| Hypoxia induced β-catenin lactylation promotes the cell proliferation and stemness of colorectal cancer through the wnt signaling pathway | Experimental Cell Research | Z. Miao | 2023 | 43 | 3.3 | Q2 | β-catenin | promote β-catenin protein stability and expression | colorectal cancer |

**Table S4 (continued)**

| KAT8-catalyzed lactylation promotes eEF1A2-mediated protein synthesis and colorectal carcinogenesis | Proceedings of the National Academy of Sciences of the United States of America | B. T. Xie | 2024 | 37 | 9.4 | Q1 | eEF1A2 | promote eEF1A2 translation elongation and protein synthesis | colorectal cancer |
| --- | --- | --- | --- | --- | --- | --- | --- | --- | --- |
| Lactylome Analysis Unveils Lactylation-Dependent Mechanisms of Stemness Remodeling in the Liver Cancer Stem Cells | Advanced Science | F. Feng | 2024 | 27 | 14.3 | Q1 | ALDOA | inhibit the binding of ALDOA to DDX17 | hepatocellular carcinoma |
| Global profiling of protein lysine lactylation and potential target modified protein analysis in hepatocellular carcinoma | Proteomics | H. Hong | 2023 | 26 | 3.4 | Q2 | USP14 and ABCF1 |  | hepatocellular carcinoma |
| The alanyl-tRNA synthetase AARS1 moonlights as a lactyltransferase to promote YAP signaling in gastric cancer | Journal of Clinical Investigatio | J. Y. Ju | 2024 | 26 | 13.3 | Q1 | YAP and TEAD | promote YAP and TEAD nuclear localization and stabilization | gastric cancer |

**Table S4 (continued)**

| Lactylation stabilizes DCBLD1 activating the pentose phosphate pathway to promote cervical cancer progression | Journal of Experimental & Clinical Cancer Research | Q. F. Meng | 2024 | 24 | 11.4 | Q1 | DCBLD1 | promote DCBLD1 stability | cervical cancer |
| --- | --- | --- | --- | --- | --- | --- | --- | --- | --- |
| CENPA functions as a transcriptional regulator to promote hepatocellular carcinoma progression via cooperating with YY1 | International Journal of Biological Sciences | J. Y. Liao | 2023 | 23 | 8.2 | Q1 | CENPA | promote CENPA transcriptional activation ability | hepatocellular carcinoma |
| Glycometabolic reprogramming-induced XRCC1 lactylation confers therapeutic resistance in ALDH1A3-overexpressing glioblastoma | Cell Metabolism | G. Z. Li | 2024 | 17 | 27.7 | Q1 | XRCC1 | promote XRCC1 affinity for importin α | glioblastoma |
| Human papillomavirus-16 E6 activates the pentose phosphate pathway to promote cervical cancer cell proliferation by inhibiting G6PD lactylation | Redox Biology | Q. F. Meng | 2024 | 14 | 10.7 | Q1 | G6PD | promote G6PD dimer formation | cervical cancer |

**Table S4 (continued)**

| Nucleolin lactylation contributes to intrahepatic cholangiocarcinoma pathogenesis via RNA splicing regulation of MADD | Journal of Hepatology | L. Yang | 2024 | 14 | 26.8 | Q1 | Nucleolin | promote MADD transcription | intrahepatic cholangiocarcinoma |
| --- | --- | --- | --- | --- | --- | --- | --- | --- | --- |
| BZW2 Modulates Lung Adenocarcinoma Progression through Glycolysis-Mediated IDH3G Lactylation Modification | Journal of Proteome Research | M. Wang | 2023 | 13 | 3.8 | Q1 | IDH3G | promote lung adenocarcinoma progression | lung adenocarcinoma |
| Lactylated Apolipoprotein C-II Induces Immunotherapy Resistance by Promoting Extracellular Lipolysis | Advanced Science | J. Chen | 2024 | 11 | 14.3 | Q1 | APOC2 | promote APOC2 stability | non-small-cell lung cancer |
| Tumor-resident microbiota contributes to colorectal cancer liver metastasis by lactylation and immune modulation | Oncogene | J. Gu | 2024 | 11 | 6.9 | Q1 | RIG-I | inhibit NF-κB transcription | colorectal cancer |

**Table S4 (continued)**

| Hypoxia promotes non-small cell lung cancer cell stemness, migration, and invasion via promoting glycolysis by lactylation of SOX9 | Cancer Biology & Therapy | F. Yan | 2024 | 11 | 4.4 | Q2 | SOX9 | promote non-small cell lung cancer cell progression | non-small cell lung cancer cell |
| --- | --- | --- | --- | --- | --- | --- | --- | --- | --- |
| Pseudogene MAPK6P4-encoded functional peptide promotes glioblastoma vasculogenic mimicry development | Communications Biology | M. Y. Zhang | 2023 | 11 | 5.2 | Q1 | VEGFR2 VE-cadherin | promote VEGFR2 and VE-cadherin protein expression | glioblastoma |
| Proteomic analysis identifies PFKP lactylation in SW480 colon cancer cells | Iscience | Z. Cheng | 2023 | 10 | 4.6 | Q1 | PFKP | inhibit PFKP activity | colon cancer |
| Hypoxia-induced SHMT2 protein lactylation facilitates glycolysis and stemness of esophageal cancer cells | Molecular and Cellular Biochemistry | Z. Qiao | 2024 | 10 | 3.5 | Q3 | SHMT2 | promote SHMT2 stability | esophageal cancer |

**Table S4 (continued)**

| Lactate enhances NMNAT1 lactylation to sustain nuclear NAD plus salvage pathway and promote survival of pancreatic adenocarcinoma cells under glucose-deprived conditions | Cancer Letters | H. M. Huang | 2024 | 7 | 9.1 | Q1 | NMNAT1 | promote NMNAT1 nuclear localization and maintains enzymatic activity | pancreatic adenocarcinoma |
| --- | --- | --- | --- | --- | --- | --- | --- | --- | --- |
| Integrated Lactylome Characterization Reveals the Molecular Dynamics of Protein Regulation in Gastrointestinal Cancers | Advanced Science | Y. M. Duan | 2024 | 5 | 14.3 | Q1 | CBX3 | promote the binding of CBX3 to H3K9me3 | gastrointestinal cancers |
| Lactylation of NAT10 promotes N4-acetylcytidine modification on tRNASer-CGA-1-1 to boost oncogenic DNA virus KSHV reactivation | Cell Death and Differentiation | Q. Yan | 2024 | 5 | 13.7 | Q1 | NAT10 | promote N4-acetylcytidine modification on tRNASer-CGA-1-1 | DNA virus KSHV |
| Hypoxia exposure induces lactylation of Axin1 protein to promote glycolysis of esophageal carcinoma cells | Biochemical Pharmacology | Q. Li | 2024 | 4 | 5.3 | Q1 | Axin1 | promote Axin1 ubiquitination modification | esophageal carcinoma |

**Table S4 (continued)**

| Lysine lactylation-based insight to understanding the characterization of cervical cancer | Biochimica Et Biophysica Acta-Molecular Basis of Disease | C. R. He | 2024 | 3 | 4.2 | Q1 | PPP1R14B | influence HeLa cell migration and proliferation | cervical cancer |
| --- | --- | --- | --- | --- | --- | --- | --- | --- | --- |
| Tumor metabolite lactate promotes tumorigenesis through modulating Moesin lactylation and TGF-b signaling of regulatory T cells | Cell reports | J. Gu | 2021 | 1 | 7.5 | Q1 | MOESIN | promote MOESIN interaction with TGF-β |  |
| Lactate-induced IGF1R protein lactylation promotes proliferation and metabolic reprogramming of lung cancer cells | Open Life Sciences | R. Zhang | 2024 | 1 | 1.7 | Q3 | IGF1R | promote IGF1R stability | lung cancer |

**Table S4 (continued)**

| Establishment and Verification of a Novel Gene Signature Connecting Hypoxia and Lactylation for Predicting Prognosis and Immunotherapy of Pancreatic Ductal Adenocarcinoma Patients by Integrating Multi-Machine Learning and Single-Cell Analysis | International Journal of Molecular Sciences | Y. Zheng | 2024 | 1 | 4.9 | Q1 | CENPA |  | pancreatic ductal adenocarcinoma |
| --- | --- | --- | --- | --- | --- | --- | --- | --- | --- |
| Dexmedetomidine inhibits the migration, invasion, and glycolysis of glioblastoma cells by lactylation of c-myc | Neurological Research | J. L. Zhu | 2024 | 1 | 1.7 | Q3 | c-myc | promote c-myc stability | glioblastoma |
| ABCF1-K430-Lactylation promotes HCC malignant progression via transcriptional activation of HIF1 signaling pathway | Cell Death and Differentiation | H. Hong | 2025 |  | 13.7 | Q1 | ABCF1 | promote ABCF1 enter the nucleus | hepatocellular carcinoma |

**Table S4 (continued)**

| Multi-omics reveals lactylation-driven regulatory mechanisms promoting tumor progression in oral squamous cell carcinoma | Genome Biology | F. Y. Jing | 2024 |  | 10.1 | Q1 | DHX9 | promote OSCC occurrence and development | oral squamous cell carcinoma |
| --- | --- | --- | --- | --- | --- | --- | --- | --- | --- |
| Lactylation-Driven IGF2BP3-Mediated Serine Metabolism Reprogramming and RNA m6A-Modification Promotes Lenvatinib Resistance in HCC | Advanced Science | Y. X. Lu | 2024 |  | 14.3 | Q1 | IGF2BP3 | promote the binding of IGF2BP3 to m6A‐modified PCK2 and NRF2 mRNAs | hepatocellular carcinoma |
| PFKP Lactylation Promotes the Ovarian Cancer Progression Through Targeting PTEN | Biochemical Genetics | J. F. Mi | 2024 |  | 2.1 | Q3 | PFKP | promote PFKP stability | ovarian cancer |
| K90 lactylation orchestrates YAP nuclear sequestration by impairing binding with exportin CRM1 and enhances HCC malignancy | Cancer Letters | L. Wang | 2024 |  | 9.1 | Q1 | yap | inhibit the binding of yap to exportin CRM1 | hepatocellular carcinoma |

**Table S4 (continued)**

| Delactylation diminished the growth inhibitory role of CA3 by restoring DUOX2 expression in hepatocellular carcinoma | Experimental Cell Research | J. Yan | 2025 |  | 3.3 | Q2 | CA3 | promote CA3 stability | hepatocellular carcinoma |
| --- | --- | --- | --- | --- | --- | --- | --- | --- | --- |
| RHOF promotes Snail1 lactylation by enhancing PKM2-mediated glycolysis to induce pancreatic cancer cell endothelial-mesenchymal transition | Cancer & Metabolism | R. Zhao | 2024 |  | 6 | Q1 | Snail1 |  | pancreatic cancer |

**Table S5. Cancer Hallmarks and Lactylation**

| **Title** | **Journals** | **First author** | **Year** | **Citations** | **2024IF** | **JCR** |
| --- | --- | --- | --- | --- | --- | --- |
| **deregulating cellular metabolism** | | | | | | |
| Tumor-derived lactate promotes resistance to bevacizumab treatment by facilitating autophagy enhancer protein RUBCNL expression through histone H3 lysine 18 lactylation (H3K18la) in colorectal cancer | Autophagy | W. H. Li | 2024 | 67 | 14.6 | Q1 |
| Numb/Parkin-directed mitochondrial fitness governs cancer cell fate via metabolic regulation of histone lactylation | Cell Reports | Y. M. He | 2023 | 54 | 7.5 | Q1 |
| Positive feedback regulation between glycolysis and histone lactylation drives oncogenesis in pancreatic ductal adenocarcinoma | Molecular Cancer | F. Li | 2024 | 19 | 27.7 | Q1 |
| Glycometabolic reprogramming-induced XRCC1 lactylation confers therapeutic resistance in ALDH1A3-overexpressing glioblastoma | Cell Metabolism | G. Z. Li | 2024 | 14 | 27.7 | Q1 |
| Metabolic Recoding of NSUN2-Mediated m5C Modification Promotes the Progression of Colorectal Cancer via the NSUN2/YBX1/m5C-ENO1 Positive Feedback Loop | Advanced Science | B. X. Chen | 2024 | 13 | 14.3 | Q1 |
| Zeb1-controlled metabolic plasticity enables remodeling of chromatin accessibility in the development of neuroendocrine prostate cancer | Cell Death and Differentiation | D. Wang | 2024 | 8 | 13.7 | Q1 |
| Lactate reprograms glioblastoma immunity through CBX3-regulated histone lactylation | Journal of Clinical Investigation | S. Wang | 2024 | 3 | 13.3 | Q1 |
| Lactate-induced IGF1R protein lactylation promotes proliferation and metabolic reprogramming of lung cancer cells | Open Life Sciences | R. Zhang | 2024 | 1 | 1.7 | Q3 |

**Table S5 (continued)**

| Hypoxia-Inducible Factor-1α Regulates BNIP3-Dependent Mitophagy and Mediates Metabolic Reprogramming Through Histone Lysine Lactylation Modification to Affect Glioma Proliferation and Invasion | Journal of Biochemical and Molecular Toxicology | F. Dong | 2025 | 0 | 3.2 | Q2 |
| --- | --- | --- | --- | --- | --- | --- |
| Lactylation-Driven IGF2BP3-Mediated Serine Metabolism Reprogramming and RNA m6A-Modification Promotes Lenvatinib Resistance in HCC | Advanced Science | Y. X. Lu | 2024 | 0 | 14.3 | Q1 |
| Low level exposure to BDE-47 facilitates the development of prostate cancer through TOP2A/LDHA/lactylation positive feedback circuit | Environmental Research | L. L. Tian | 2024 | 0 | 7.7 | Q1 |
| **Avoiding immune destruction** | | | | | | |
| Lactylation-driven METTL3-mediated RNA m6A modification promotes immunosuppression of tumor-infiltrating myeloid cells | Molecular Cell | J. Xiong | 2022 | 323 | 14.5 | Q1 |
| Identification of lactylation related model to predict prognostic, tumor infiltrating immunocytes and response of immunotherapy in gastric cancer | Frontiers in Immunology | H. Yang | 2023 | 49 | 5.7 | Q1 |
| STAT5 promotes PD-L1 expression by facilitating histone lactylation to drive immunosuppression in acute myeloid leukemia | Signal Transduction and Targeted Therapy | Z.W.Huang | 2023 | 39 | 40.8 | Q1 |
| Glucose-driven histone lactylation promotes monocyte-derived macrophages in glioblastoma | Immunity | A. De Leo | 2024 | 29 | 25.5 | Q1 |
| Oxamate enhances the efficacy of CAR-T therapy against glioblastoma via suppressing ectonucleotidases and CCR8 lactylation | Journal of Experimental & Clinical Cancer Research | T. Sun | 2023 | 29 | 11.4 | Q1 |
| Mutant KRAS-activated circATXN7 fosters tumor immunoescape by sensitizing tumor-specific T cells to activation-induced cell death | Nature Communications | C. Zhou | 2024 | 20 | 14.7 | Q1 |
| H3K18 Lactylation Potentiates Immune Escape of Non-Small Cell Lung Cancer | Cancer Research | C. Zhang | 2024 | 14 | 12.5 | Q1 |

**Table S5 (continued)**

| Lactylated Apolipoprotein C-II Induces Immunotherapy Resistance by Promoting Extracellular Lipolysis | Advanced Science | J. Chen | 2024 | 11 | 14.3 | Q1 |
| --- | --- | --- | --- | --- | --- | --- |
| A multi-dimensional approach to unravel the intricacies of lactylation related signature for prognostic and therapeutic insight in colorectal cancer | Journal of Translational Medicine | H. X. Huang | 2024 | 10 | 6.1 | Q1 |
| Targeting SRSF10 might inhibit M2 macrophage polarization and potentiate anti-PD-1 therapy in hepatocellular carcinoma | Cancer Communications | J. L. Cai | 2024 | 9 | 20.1 | Q1 |
| H3K18 lactylation-mediated VCAM1 expression promotes gastric cancer progression and metastasis via AKT-mTOR-CXCL1 axis | Biochemical Pharmacology | Y. P. Zhao | 2024 | 9 | 5.3 | Q1 |
| **Activating invasion and metastasis** | | | | | | |
| PCSK9 promotes the progression and metastasis of colon cancer cells through regulation of EMT and PI3K/AKT signaling in tumor cells and phenotypic polarization of macrophages | Journal of Experimental & Clinical Cancer Research | L. Wang | 2022 | 106 | 11.4 | Q1 |
| NUSAP1-LDHA-Glycolysis-Lactate feedforward loop promotes Warburg effect and metastasis in pancreatic ductal adenocarcinoma | Cancer Letters | M. Chen | 2023 | 49 | 9.1 | Q1 |
| Enterobacterial LPS-inducible LINC00152 is regulated by histone lactylation and promotes cancer cells invasion and migration | Frontiers in Cellular and Infection Microbiology | J. W. Wang | 2022 | 48 | 4.6 | Q1 |
| GPR37 promotes colorectal cancer liver metastases by enhancing the glycolysis and histone lactylation via Hippo pathway | Oncogene | J. M. Zhou | 2023 | 31 | 6.9 | Q1 |
| Lactylation stabilizes DCBLD1 activating the pentose phosphate pathway to promote cervical cancer progression | Journal of Experimental & Clinical Cancer Research | Q. F. Meng | 2024 | 22 | 11.4 | Q1 |
| Hypoxia promotes non-small cell lung cancer cell stemness, migration, and invasion via promoting glycolysis by lactylation of SOX9 | Cancer Biology & Therapy | F. Yan | 2024 | 11 | 4.4 | Q2 |
| Tumor-resident microbiota contributes to colorectal cancer liver metastasis by lactylation and immune modulation | Oncogene | J. Gu | 2024 | 10 | 6.9 | Q1 |

**Table S5 (continued)**

| FKBP10 promotes clear cell renal cell carcinoma progression and regulates sensitivity to the HIF2α blockade by facilitating LDHA phosphorylation | Cell Death & Disease | R. Liu | 2024 | 10 | 8.1 | Q1 |
| --- | --- | --- | --- | --- | --- | --- |
| KCNK1 promotes proliferation and metastasis of breast cancer cells by activating lactate dehydrogenase A (LDHA) and up-regulating H3K18 lactylation | Plos Biology | X. C. Hou | 2024 | 7 | 7.8 | Q1 |
| Lactate activates CCL18 expression via H3K18 lactylation in macrophages to promote tumorigenesis of ovarian cancer | Acta Biochimica Et Biophysica Sinica | J. R. Sun | 2024 | 5 | 3.3 | Q1 |
| Histone lactylation facilitates hepatocellular carcinoma progression by upregulating endothelial cell-specific molecule 1 expression | Molecular Carcinogenesis | P. Zhao | 2024 | 5 | 3 | Q2 |
| **Angiogenesis** | | | | | | |
| HIF1α lactylation enhances KIAA1199 transcription to promote angiogenesis and vasculogenic mimicry in prostate cancer | International Journal of Biological | Y. W. Luo | 2022 | 82 | 7.7 | Q1 |
| Evodiamine impairs HIF1A histone lactylation to inhibit Sema3A-mediated angiogenesis and PD-L1 by inducing ferroptosis in prostate cancer | European Journal of Pharmacology | Y. Yu | 2023 | 33 | 4.2 | Q1 |
| Pseudogene MAPK6P4-encoded functional peptide promotes glioblastoma vasculogenic mimicry development | Communications Biology | M. Y. Zhang | 2023 | 11 | 5.2 | Q1 |
| Integrating Single-Cell and Spatial Transcriptomics to Uncover and Elucidate GP73-Mediated Pro-Angiogenic Regulatory Networks in Hepatocellular Carcinoma | Research | J. Z. Ye | 2024 | 6 | 8.5 | Q1 |


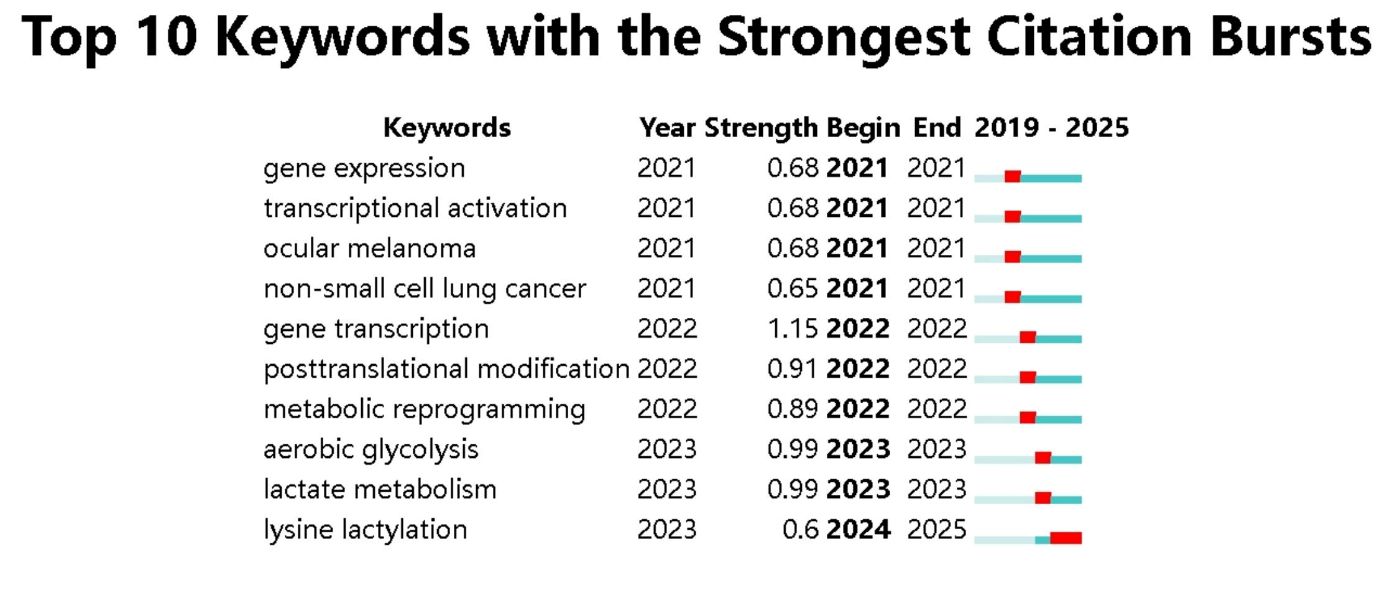

Supplement: Supplementary file 1 [file 6f57092d232f71af686e4ae9.docx]
